# Supplementary material for: Effect of vitamin D supplementation on cardiac-metabolic risk factors in elderly: a systematic review and meta-analysis of clinical trials
Source: PubMed Central journal article supplement (PMC9233853; doi:10.1186/s13098-022-00859-0), 2022-06-25
Supplement: 13098_2022_859_MOESM2_ESM.pdf [file 13098_2022_859_MOESM2_ESM.pdf]

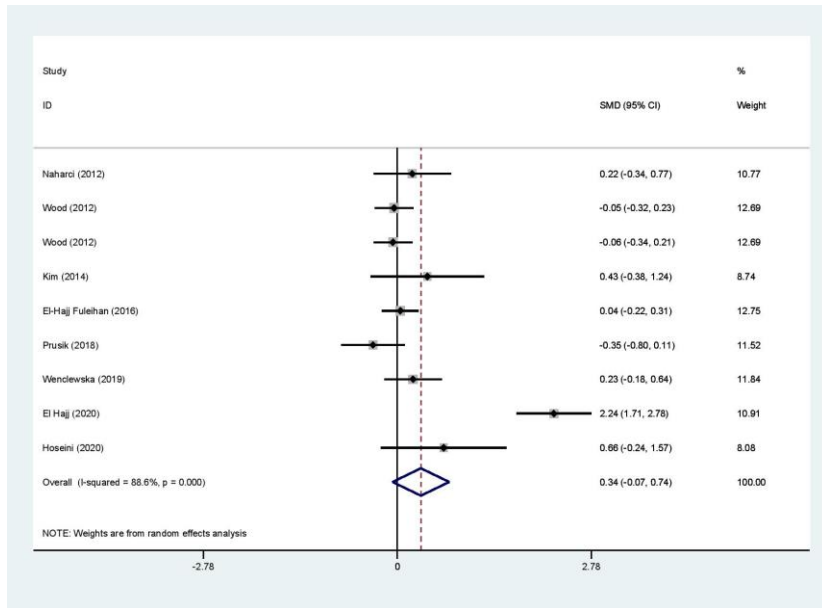

**a**

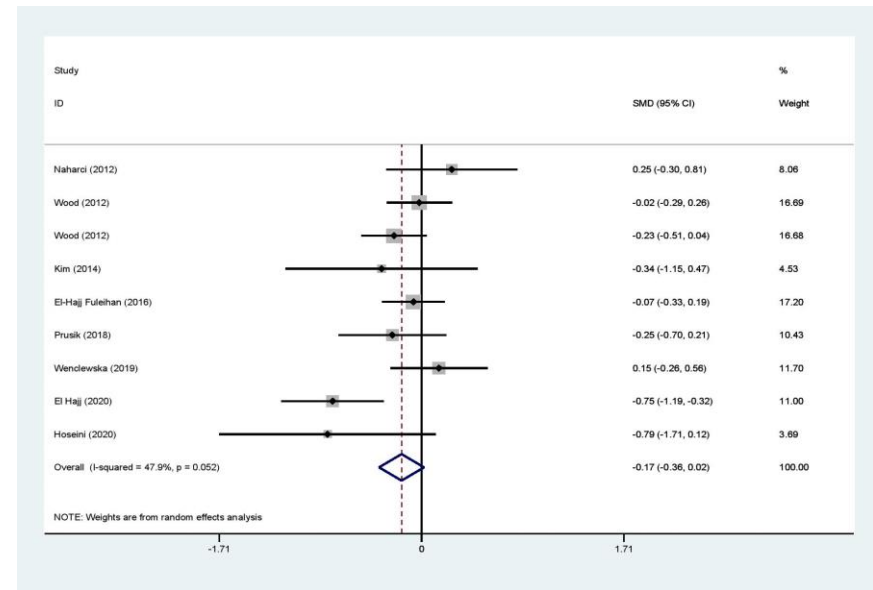

**b**

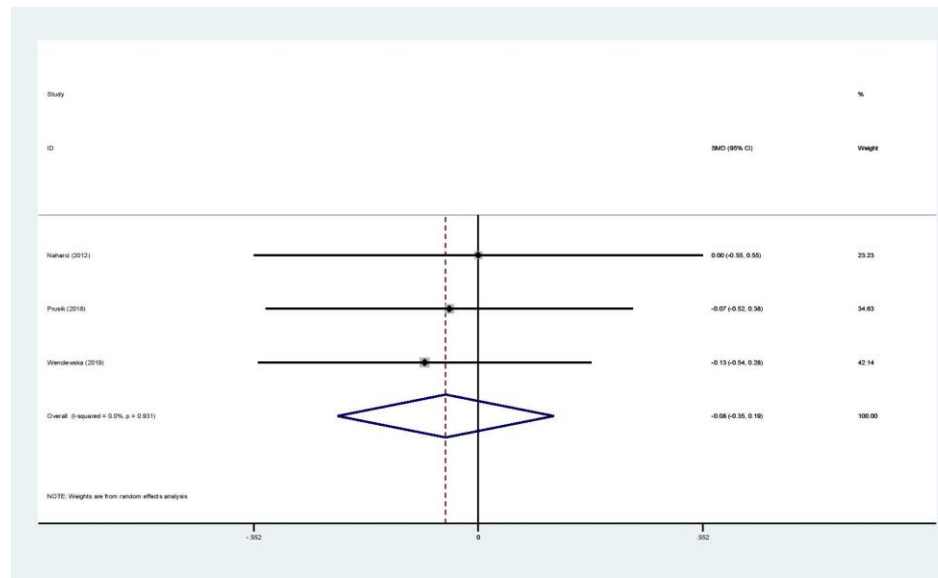

**c**
