# Supplementary material for: Effect of vitamin D supplementation on cardiac-metabolic risk factors in elderly: a systematic review and meta-analysis of clinical trials
Source: Springer Nature journal article supplement (doi:10.1186/s13098-022-00859-0), 2022-06-25
Supplement: MOESM4 [file 23205874]

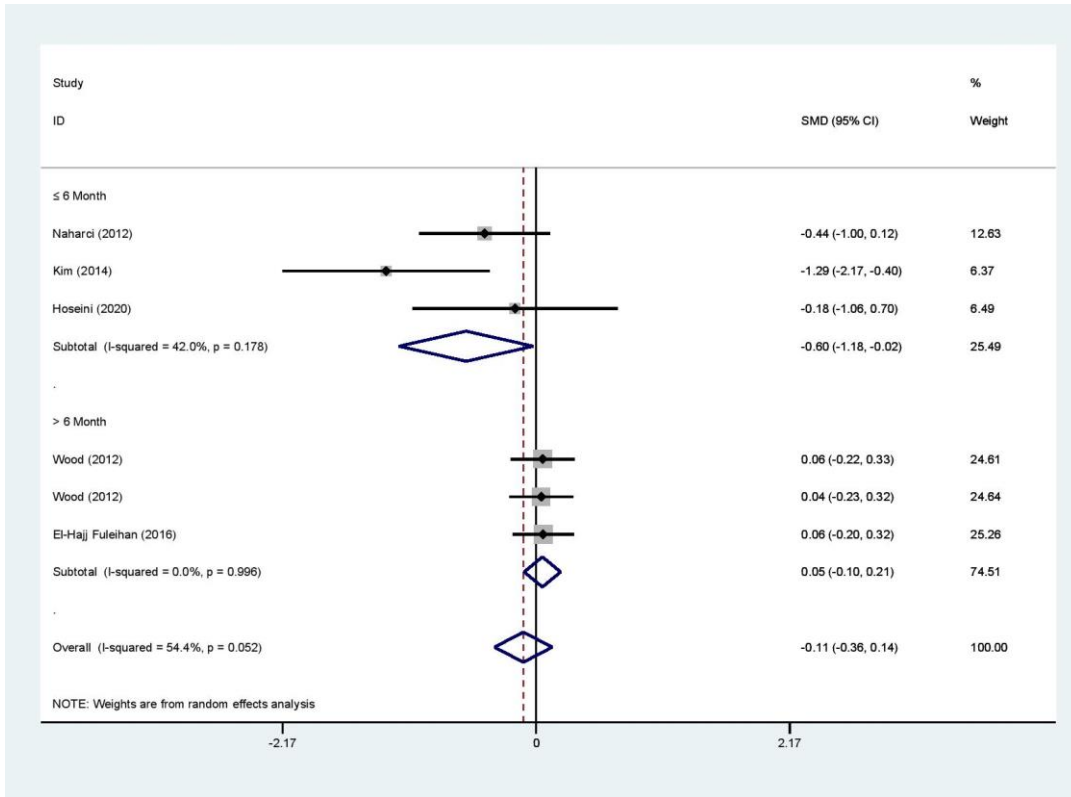

**a**

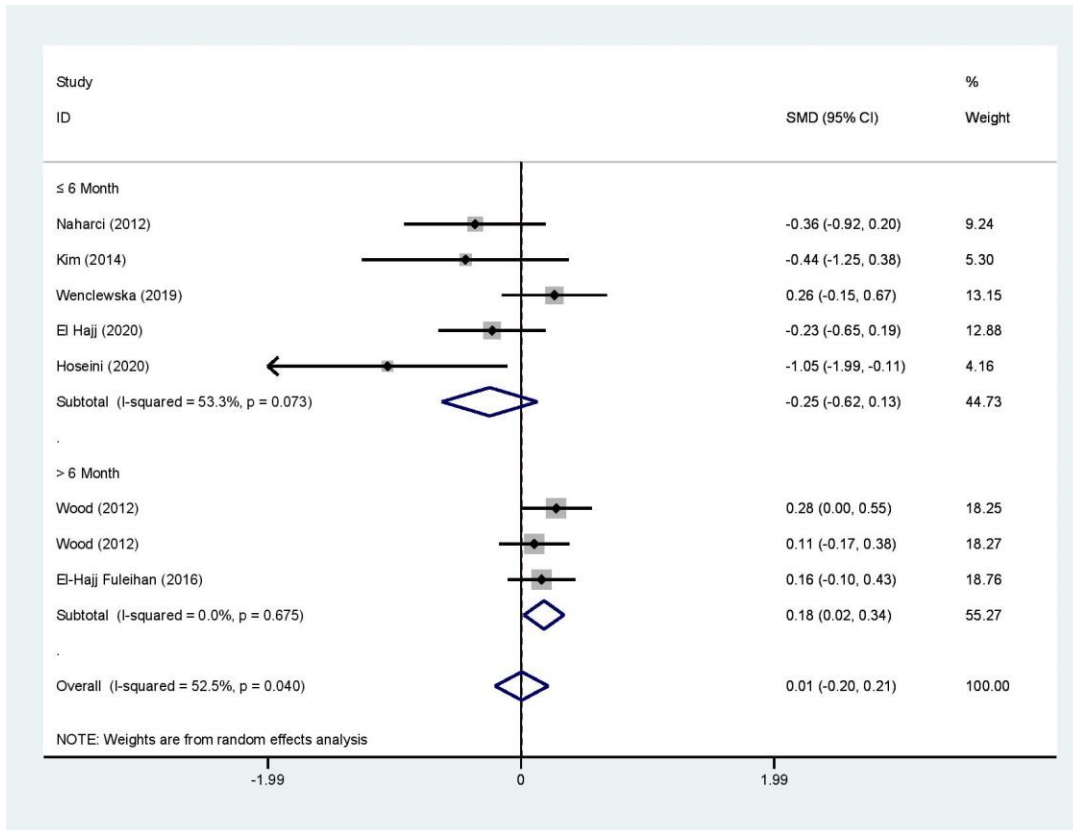

**b**
